# Supplementary material for: A Cost-Effective Nucleic Acid Detection System Using a Portable Microscopic Device
Source: Micromachines (Basel). 2022 May 31;13(6):869. doi: 10.3390/mi13060869 (PMC9227208; doi:10.3390/mi13060869)
Supplement: Supplementary file 1 [file micromachines-13-00869-s001.zip › micromachines-1722174-supplementary figure.pdf]

# A Cost-Effective Nucleic Acid Detection System Using a Portable Microscopic Device

Chengzhuang Yu <sup>1</sup>, Shanshan Li <sup>1,2,\*</sup>, Chunyang Wei <sup>1</sup>, Shijie Dai <sup>2,\*</sup>, Xinyi Liang <sup>3</sup> and Junwei Li <sup>3,\*</sup>

<sup>1</sup> Hebei Key Laboratory of Smart Sensing and Human-Robot Interactions, School of Mechanical Engineering, Hebei University of Technology, Tianjin 300130, China; 201811201004@stu.hebut.edu.cn (C.Y.); 201811201008@stu.hebut.edu.cn (C.W.)

<sup>2</sup> State Key Laboratory of Reliability and Intelligence of Electrical Equipment, Hebei University of Technology, Tianjin 300130, China

<sup>3</sup> Institute of Biophysics, School of Health Sciences and Biomedical Engineering, Hebei University of Technology, Tianjin 300130, China; 202121103006@stu.hebut.edu.cn

\* Correspondence: sli\_mems@hebut.edu.cn (S.L.); dsj@hebut.edu.cn (S.D.); junwei\_li@hebut.edu.cn (J.L.)

## Supplemental Materials List:

Figure S1: The estimation of the field-of-view of our portable microscopic device from a commercial hemocytometer.

Video S1: The operations for the XYZ movement

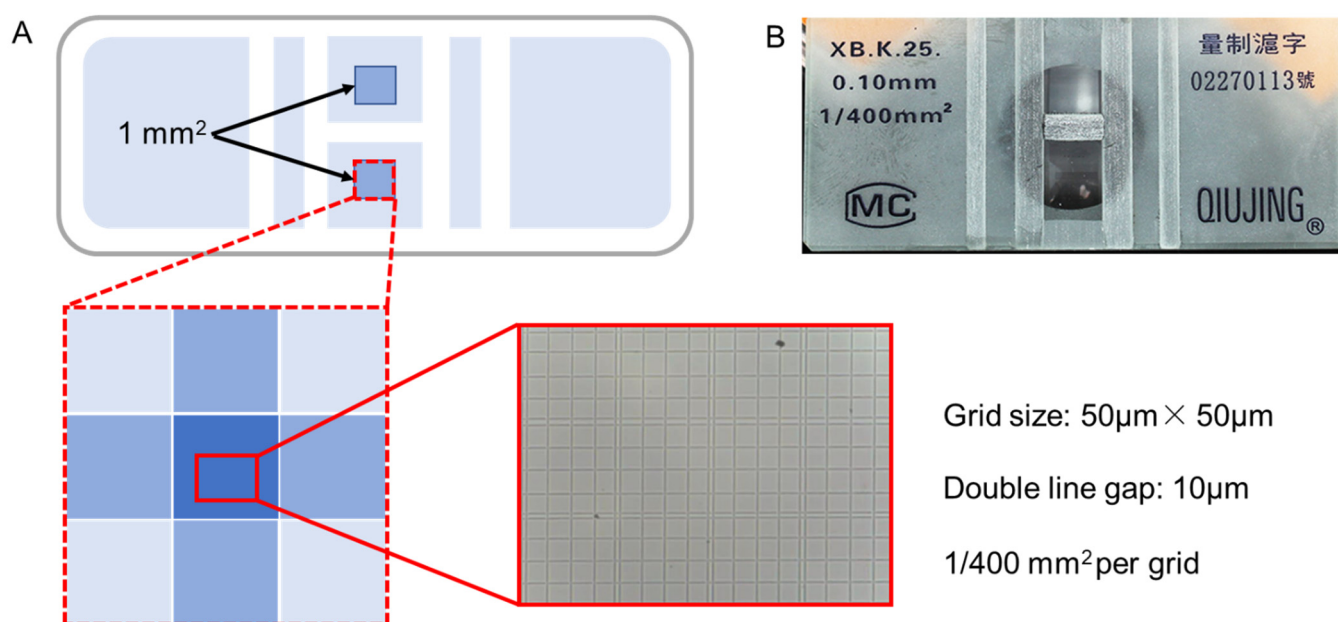

**Figure S1.** The estimation of the field-of-view of our portable microscopic device from a commercial hemocytometer. (A) the meshing grids of the hemocytometer. (B) the physical image of the commercial hemocytometer used in this work.
